# Supplementary material for: Cancer–Osteoblast Interaction Reduces Sost Expression in Osteoblasts and Up-Regulates lncRNA MALAT1 in Prostate Cancer
Source: PubMed Central journal article supplement (PMC4996404; doi:10.3390/microarrays4040503), 2015-10-29
Supplement: microarrays-04-00503-s001.pdf [file microarrays-04-00503-s001.pdf]

## Supplementary Information

**Table S1.** Primers used for quantitative PCR.

| Species | Gene           | Forward                | Reverse                |
|---------|----------------|------------------------|------------------------|
| Rat     | <i>Il-6</i>    | TCCATCTGCCCTTCAGGAAC   | ATACTGGTCTGTTGTGGGTGG  |
| Rat     | <i>Ctgf</i>    | CTGCCAAAGATGGTGCACC    | ATTTCCCGGGCAGCTTGAC    |
| Rat     | <i>Adamts1</i> | TGACACAGCGATTCTGTTCACC | CCAATTCATGGGCTGTGGTG   |
| Rat     | <i>Sost</i>    | GCCTTCGTTGCTGTGGAGAG   | GCTGTACTCGGACACGTCTTTG |
| Rat     | <i>Sostdc1</i> | GCAGCAACAGCACCTTGAATC  | TGTATTTGGTGGACCGCAGTTC |
| Rat     | <i>Mmp13</i>   | GCCTTCAAGGTCTGGTCTGATG | AAAGCGTGTGCCAGAAGACC   |
| Human   | <i>MALAT1</i>  | GCTGGGGGAAGTTAAATATG   | GTTAATGTCAGCCCAGTAGG   |

**Table S2.** Genes more than two-fold up- or down-regulated in UMR-106 osteoblastic cells co-cultured with prostate cancer cells (PC3) compared to UMR-106 cells cultured alone.

| Gene             | Log2 Fold Change | p-Value               | Adjusted p-Value |
|------------------|------------------|-----------------------|------------------|
| <i>Mmp13</i>     | 7.379026511      | $4.19 \times 10^{-7}$ | 0.00268023       |
| <i>Gng5</i>      | 7.223894682      | $9.97 \times 10^{-5}$ | 0.019744835      |
| <i>Hspb11</i>    | 6.154948595      | $9.11 \times 10^{-5}$ | 0.019528593      |
| <i>Ifitm1</i>    | 4.876494699      | $1.04 \times 10^{-6}$ | 0.00268023       |
| <i>Cp</i>        | 4.788420215      | $9.15 \times 10^{-7}$ | 0.00268023       |
| <i>Cav1</i>      | 4.710019852      | $1.61 \times 10^{-6}$ | 0.003570654      |
| <i>Lbp</i>       | 4.110706375      | $4.47 \times 10^{-6}$ | 0.005777101      |
| <i>Steap4</i>    | 4.092986124      | $6.32 \times 10^{-6}$ | 0.007010559      |
| <i>Sec61a1</i>   | 3.924895985      | 0.000636              | 0.04167131       |
| <i>Wisp2</i>     | 3.856685884      | $3.63 \times 10^{-5}$ | 0.015103966      |
| <i>Cp</i>        | 3.751837407      | $3.87 \times 10^{-6}$ | 0.005777101      |
| <i>Slpi</i>      | 3.635567198      | $5.15 \times 10^{-6}$ | 0.006144527      |
| <i>Igfbp5</i>    | 3.620444597      | $4.46 \times 10^{-6}$ | 0.005777101      |
| <i>A2m</i>       | 3.471647174      | $2.17 \times 10^{-5}$ | 0.011604771      |
| <i>Cp</i>        | 3.43628021       | $4.14 \times 10^{-6}$ | 0.015531321      |
| <i>Utp111</i>    | 3.434692273      | 0.000289              | 0.030120265      |
| <i>Il1rl1</i>    | 3.407958196      | $9.57 \times 10^{-5}$ | 0.019553503      |
| <i>Kenma1</i>    | 3.341138681      | 0.000927              | 0.049112152      |
| <i>Lcp2</i>      | 3.032559949      | $4.96 \times 10^{-5}$ | 0.015531321      |
| <i>Igfbp5</i>    | 3.005322318      | $1.75 \times 10^{-5}$ | 0.010463506      |
| <i>Lcp2</i>      | 2.96408364       | 0.000129              | 0.021140106      |
| <i>Sephs1</i>    | 2.823095157      | 0.000508              | 0.037927329      |
| <i>Il6</i>       | 2.807731249      | $2.96 \times 10^{-5}$ | 0.013108396      |
| <i>Egr2</i>      | 2.781177887      | $1.94 \times 10^{-5}$ | 0.010885868      |
| <i>Pacrg</i>     | 2.766776364      | $2.47 \times 10^{-5}$ | 0.011906394      |
| <i>Cxcl1</i>     | 2.551449698      | $6.76 \times 10^{-5}$ | 0.017496943      |
| <i>Mgp</i>       | 2.518383482      | 0.000517              | 0.038072221      |
| <i>Cebpd</i>     | 2.446527999      | $4.74 \times 10^{-5}$ | 0.015531321      |
| <i>LOC690768</i> | 2.424213769      | $4.98 \times 10^{-5}$ | 0.015531321      |
| <i>Egr1</i>      | 2.391719762      | $8.01 \times 10^{-5}$ | 0.019430575      |
| <i>Maf</i>       | 2.328651566      | 0.000137              | 0.021691694      |

Table S2. Cont.

| Gene             | Log2 Fold Change | p-Value               | Adjusted p-Value |
|------------------|------------------|-----------------------|------------------|
| <i>Fam20c</i>    | 2.28896788       | $3.8 \times 10^{-5}$  | 0.015103966      |
| <i>Sfrp4</i>     | 2.283767959      | $7.43 \times 10^{-5}$ | 0.018309318      |
| <i>Tubb4b</i>    | 2.269699129      | $4.67 \times 10^{-5}$ | 0.015531321      |
| <i>Itgb3</i>     | 2.248692653      | 0.000106              | 0.019744835      |
| <i>Fst</i>       | 2.160638095      | 0.000527              | 0.03813544       |
| <i>Nr4a1</i>     | 2.159699899      | 0.000193              | 0.025661861      |
| <i>LOC685067</i> | 2.130158298      | 0.000157              | 0.023351615      |
| <i>Milr1</i>     | 2.126473716      | 0.000287              | 0.030120265      |
| <i>Tbx18</i>     | 2.04560636       | 0.000199              | 0.025958606      |
| <i>Adamts4</i>   | 2.043578289      | 0.000354              | 0.032508229      |
| <i>Sostdc1</i>   | 1.968348717      | $9.18 \times 10^{-5}$ | 0.019528593      |
| <i>Slfn3</i>     | 1.94161152       | 0.000654              | 0.04248144       |
| <i>Slc1a3</i>    | 1.936053744      | 0.000119              | 0.019860957      |
| <i>Junb</i>      | 1.933333388      | 0.000417              | 0.034999079      |
| <i>LOC365985</i> | 1.850302469      | 0.000265              | 0.029012693      |
| <i>Rarb</i>      | 1.779069222      | 0.000162              | 0.023351615      |
| <i>Sbno2</i>     | 1.76970024       | 0.00016               | 0.023351615      |
| <i>Cpne8</i>     | 1.747024502      | 0.000668              | 0.043011784      |
| <i>Pecam1</i>    | 1.746836203      | 0.000141              | 0.0221523        |
| <i>Fos</i>       | 1.745639593      | 0.00012               | 0.019860957      |
| <i>Lum</i>       | 1.745462682      | 0.00012               | 0.019860957      |
| <i>Enpp3</i>     | 1.745181674      | 0.000318              | 0.031052101      |
| <i>Sned1</i>     | 1.732815148      | 0.000328              | 0.031458772      |
| <i>Ddx60</i>     | 1.730363161      | 0.000381              | 0.033707214      |
| <i>LOC290595</i> | 1.714683948      | 0.000162              | 0.023351615      |
| <i>Dhrs3</i>     | 1.711017884      | 0.000155              | 0.023351615      |
| <i>Btg2</i>      | 1.663826772      | 0.000411              | 0.034939252      |
| <i>Tmem176a</i>  | 1.649114303      | 0.0002                | 0.025958606      |
| <i>Etv1</i>      | 1.648364577      | 0.000492              | 0.037927329      |
| <i>Adamts1</i>   | 1.639779418      | 0.000357              | 0.032508229      |
| <i>Rgs2</i>      | 1.63895833       | 0.000161              | 0.023351615      |
| <i>Rtp4</i>      | 1.631378976      | 0.000159              | 0.023351615      |
| <i>GpnmB</i>     | 1.621638758      | 0.00023               | 0.027913204      |
| <i>Zfat</i>      | 1.586637322      | 0.000201              | 0.025958606      |
| <i>Gpx3</i>      | 1.586520436      | 0.000182              | 0.024498747      |
| <i>Ifitm3</i>    | 1.584473394      | 0.000348              | 0.032365926      |
| <i>Tmcc3</i>     | 1.572494999      | 0.00044               | 0.03593996       |
| <i>RT1-S3</i>    | 1.568845855      | 0.000947              | 0.049648639      |
| <i>Igsf3</i>     | 1.561877664      | 0.00025               | 0.028747279      |
| <i>Ddx58</i>     | 1.560208302      | 0.000313              | 0.030924625      |
| <i>Igsf3</i>     | 1.552538981      | 0.000255              | 0.028747279      |
| <i>Etv1</i>      | 1.549842194      | 0.000246              | 0.028747279      |
| <i>Mafb</i>      | 1.529663777      | 0.000222              | 0.027732607      |
| <i>Col13a1</i>   | 1.518290628      | 0.00045               | 0.036532692      |
| <i>Dusp6</i>     | 1.515067995      | 0.000609              | 0.040777546      |

Table S2. Cont.

| Gene              | Log2 Fold Change | p-Value  | Adjusted p-Value |
|-------------------|------------------|----------|------------------|
| <i>Adamts5</i>    | 1.514558749      | 0.000499 | 0.037927329      |
| <i>Thbd</i>       | 1.489286539      | 0.000251 | 0.028747279      |
| <i>Etv1</i>       | 1.483179838      | 0.000719 | 0.043760523      |
| <i>Nfkbiz</i>     | 1.474853457      | 0.000318 | 0.031052101      |
| <i>Irf1</i>       | 1.474435736      | 0.00029  | 0.030120265      |
| <i>C1s</i>        | 1.470117495      | 0.000271 | 0.029197214      |
| <i>RGD1309362</i> | 1.454792995      | 0.000609 | 0.040777546      |
| <i>Fndc1</i>      | 1.453980928      | 0.000407 | 0.034939252      |
| <i>Igfbp4</i>     | 1.451800078      | 0.000301 | 0.030717545      |
| <i>Irx3</i>       | 1.448141648      | 0.000275 | 0.029391049      |
| <i>Spry4</i>      | 1.443735586      | 0.000387 | 0.033785709      |
| <i>Clec2d</i>     | 1.442610656      | 0.000798 | 0.045688605      |
| <i>Stat3</i>      | 1.441311554      | 0.000385 | 0.033727008      |
| <i>Col3a1</i>     | 1.435325652      | 0.000503 | 0.037927329      |
| <i>Coll4a1</i>    | 1.426672404      | 0.000714 | 0.043760523      |
| <i>Clec11a</i>    | 1.424848014      | 0.00031  | 0.030885177      |
| <i>Mgst1</i>      | 1.40354156       | 0.00035  | 0.032365926      |
| <i>Limch1</i>     | 1.396031082      | 0.000517 | 0.038072221      |
| <i>Limch1</i>     | 1.389008755      | 0.000886 | 0.048251424      |
| <i>Errfi1</i>     | 1.369208762      | 0.000673 | 0.043011784      |
| <i>Pdgfra</i>     | 1.368405638      | 0.000599 | 0.040566672      |
| <i>Jag1</i>       | 1.366861206      | 0.000616 | 0.041055327      |
| <i>Maff</i>       | 1.366701205      | 0.000468 | 0.037033815      |
| <i>Zfp36</i>      | 1.361923861      | 0.000502 | 0.037927329      |
| <i>Ecm1</i>       | 1.352201495      | 0.000673 | 0.043011784      |
| <i>Cldn10</i>     | 1.337597617      | 0.000546 | 0.038689123      |
| <i>Pde4b</i>      | 1.333246022      | 0.000814 | 0.046125666      |
| <i>RT1-S3</i>     | 1.328608388      | 0.000794 | 0.045688605      |
| <i>Enpp1</i>      | 1.328111803      | 0.000434 | 0.035642023      |
| <i>Fhl2</i>       | 1.316993183      | 0.000766 | 0.045560588      |
| <i>C1qtnf1</i>    | 1.307716459      | 0.000763 | 0.045560588      |
| <i>Iqca1</i>      | 1.305180645      | 0.000453 | 0.036532692      |
| <i>Ctgf</i>       | 1.299752782      | 0.000518 | 0.038072221      |
| <i>Etv4</i>       | 1.267451271      | 0.000544 | 0.038689123      |
| <i>Etv1</i>       | 1.262528701      | 0.00061  | 0.040777546      |
| <i>Tmem178</i>    | 1.251635087      | 0.000525 | 0.03813544       |
| <i>Scara5</i>     | 1.236160074      | 0.000769 | 0.045560588      |
| <i>Zfp3611</i>    | 1.231278015      | 0.000686 | 0.043011784      |
| <i>Smpd1</i>      | 1.228495811      | 0.000585 | 0.04016975       |
| <i>Rgl1</i>       | 1.218917979      | 0.000634 | 0.04167131       |
| <i>Cebpb</i>      | 1.21173545       | 0.000687 | 0.043011784      |
| <i>Tgfb2</i>      | 1.193588498      | 0.000752 | 0.0454512        |
| <i>Dusp1</i>      | 1.188385752      | 0.000907 | 0.048546529      |
| <i>Vwa3b</i>      | 1.162353304      | 0.000762 | 0.045560588      |

Table S2. Cont.

| Gene                | Log2 Fold Change | p-Value  | Adjusted p-Value |
|---------------------|------------------|----------|------------------|
| <i>Ier2</i>         | 1.159718751      | 0.000923 | 0.049112152      |
| <i>Prkar1b</i>      | 1.140146444      | 0.000848 | 0.046985366      |
| <i>Ggt1</i>         | 1.114173778      | 0.000956 | 0.049980306      |
| <i>Vwa3b</i>        | 1.162353304      | 0.000762 | 0.045560588      |
| <i>Ier2</i>         | 1.159718751      | 0.000923 | 0.049112152      |
| <i>Prkar1b</i>      | 1.140146444      | 0.000848 | 0.046985366      |
| <i>Ggt1</i>         | 1.114173778      | 0.000956 | 0.049980306      |
| <i>Ednrb</i>        | -1.148889398     | 0.000785 | 0.045688605      |
| <i>Gucy1a3</i>      | -1.152896202     | 0.000927 | 0.049112152      |
| <i>Cgref1</i>       | -1.173553696     | 0.000713 | 0.043760523      |
| <i>Rtn4r11</i>      | -1.182717896     | 0.000695 | 0.043155284      |
| <i>Larp1b</i>       | -1.1895208       | 0.000881 | 0.04815378       |
| <i>Atp1a2</i>       | -1.193219176     | 0.0009   | 0.048468148      |
| <i>Hhex</i>         | -1.194112413     | 0.000778 | 0.045688605      |
| <i>Tesc</i>         | -1.19528509      | 0.000717 | 0.043760523      |
| <i>Ddah1</i>        | -1.212222992     | 0.000813 | 0.046125666      |
| <i>Ntrk1</i>        | -1.234078116     | 0.000581 | 0.04016975       |
| <i>Ass1</i>         | -1.271680635     | 0.000801 | 0.045688605      |
| <i>Adarb1</i>       | -1.276598466     | 0.000846 | 0.046985366      |
| <i>Rab11fip4</i>    | -1.280019914     | 0.000568 | 0.039722703      |
| <i>Pls1</i>         | -1.316352215     | 0.00042  | 0.035050623      |
| <i>Cryab</i>        | -1.321516965     | 0.000526 | 0.03813544       |
| <i>Ppp1r1b</i>      | -1.353793377     | 0.000395 | 0.034214469      |
| <i>Nudt11</i>       | -1.36185788      | 0.000682 | 0.043011784      |
| <i>Bcl11b</i>       | -1.372178396     | 0.000376 | 0.033532672      |
| <i>Gatm</i>         | -1.376250722     | 0.000422 | 0.035050623      |
| <i>Mylpf</i>        | -1.38181054      | 0.000358 | 0.032508229      |
| <i>Csgalnact1</i>   | -1.386079167     | 0.000365 | 0.032747997      |
| <i>Fam195a</i>      | -1.390335429     | 0.000326 | 0.031426385      |
| <i>Phgdh</i>        | -1.39423251      | 0.000799 | 0.045688605      |
| <i>Psat1</i>        | -1.408704291     | 0.000432 | 0.035642023      |
| <i>Pcdh20</i>       | -1.417212857     | 0.00088  | 0.04815378       |
| <i>Bik</i>          | -1.428538912     | 0.000382 | 0.033707214      |
| <i>LOC100360867</i> | -1.430099998     | 0.00094  | 0.049449833      |
| <i>Efhc2</i>        | -1.451958035     | 0.000342 | 0.03217657       |
| <i>Gjb5</i>         | -1.47141358      | 0.000528 | 0.03813544       |
| <i>Pcsk6</i>        | -1.48512512      | 0.000508 | 0.037927329      |
| <i>Fam189a2</i>     | -1.506543161     | 0.00031  | 0.030885177      |
| <i>Ppp1r1a</i>      | -1.54174931      | 0.000773 | 0.045596975      |
| <i>Apln</i>         | -1.562663696     | 0.000238 | 0.028213947      |
| <i>Fam198b</i>      | -1.608505146     | 0.000259 | 0.028899645      |
| <i>Car3</i>         | -1.612191512     | 0.000177 | 0.02408535       |
| <i>Nup210</i>       | -1.614280857     | 0.000297 | 0.030567541      |
| <i>Cd200</i>        | -1.632823121     | 0.000191 | 0.025593021      |
| <i>Slc13a5</i>      | -1.696584071     | 0.00032  | 0.031052101      |

Table S2. Cont.

| Gene            | Log2 Fold Change | p-Value               | Adjusted p-Value |
|-----------------|------------------|-----------------------|------------------|
| <i>Ppm1l</i>    | -1.710561103     | 0.000583              | 0.04016975       |
| <i>Nrip3</i>    | -1.716346808     | 0.000133              | 0.021359606      |
| <i>Bmp3</i>     | -1.722220439     | 0.000154              | 0.023351615      |
| <i>Cd55</i>     | -1.738180076     | 0.000172              | 0.023688918      |
| <i>Vsnl1</i>    | -1.757975259     | 0.00022               | 0.027732607      |
| <i>Nexn</i>     | -1.778536045     | 0.00082               | 0.046125666      |
| <i>Mpp4</i>     | -1.792569128     | 0.000148              | 0.022963175      |
| <i>Atp2b2</i>   | -1.809843285     | 0.000635              | 0.04167131       |
| <i>Pcdh20</i>   | -1.813859613     | 0.000101              | 0.019744835      |
| <i>Hrc</i>      | -1.818929277     | 0.000227              | 0.027747838      |
| <i>Atp2b2</i>   | -1.831779646     | 0.000221              | 0.027732607      |
| <i>Metrn1</i>   | -1.848975604     | 0.000112              | 0.019744835      |
| <i>Cacna2d3</i> | -1.919424858     | 0.000902              | 0.048468148      |
| <i>Blnk</i>     | -1.96511831      | 0.000112              | 0.019744835      |
| <i>Chac1</i>    | -2.09858954      | $8.97 \times 10^{-5}$ | 0.019528593      |
| <i>Bcl11b</i>   | -2.101680223     | $8.81 \times 10^{-5}$ | 0.019528593      |
| <i>Bmper</i>    | -2.128139935     | $4.8 \times 10^{-5}$  | 0.015531321      |
| <i>Slc36a2</i>  | -2.307489216     | $4.54 \times 10^{-5}$ | 0.015531321      |
| <i>Phex</i>     | -2.365544258     | $3.04 \times 10^{-5}$ | 0.013108396      |
| <i>Slc8a3</i>   | -2.420870879     | $8.27 \times 10^{-5}$ | 0.019528593      |
| <i>Myl1</i>     | -2.519145881     | $2.48 \times 10^{-5}$ | 0.011906394      |
| <i>Sox6</i>     | -2.526611686     | 0.000119              | 0.019860957      |
| <i>Sost</i>     | -2.829981741     | $3.71 \times 10^{-5}$ | 0.015103966      |
| <i>Mamdc2</i>   | -2.858764991     | $8.55 \times 10^{-5}$ | 0.019528593      |
| <i>Ckmt2</i>    | -3.01695192      | $1.59 \times 10^{-5}$ | 0.010463506      |
| <i>Panx3</i>    | -3.19516858      | $4.73 \times 10^{-5}$ | 0.015531321      |
| <i>Vsnl1</i>    | -3.269760826     | $8.7 \times 10^{-6}$  | 0.008435516      |
| <i>Phospho1</i> | -3.481812101     | $1.32 \times 10^{-5}$ | 0.009286334      |
| <i>Smpd3</i>    | -4.175122995     | $6.36 \times 10^{-5}$ | 0.017496943      |

**Table S3.** Top 200 GO (gene ontology) terms associated with genes more than two-fold up- or down-regulated in UMR-106 osteoblastic cells co-cultured with prostate cancer cells (PC3) compared to UMR-106 cells cultured alone.

| GO ID      | GO Term                                | No. of Genes | Adjusted p-Value       |
|------------|----------------------------------------|--------------|------------------------|
| GO:0009888 | tissue development                     | 58           | $2.74 \times 10^{-15}$ |
| GO:0001503 | ossification                           | 25           | $9.23 \times 10^{-12}$ |
| GO:0009611 | response to wounding                   | 41           | $3.29 \times 10^{-10}$ |
| GO:0009719 | response to endogenous stimulus        | 43           | $8.10 \times 10^{-10}$ |
| GO:0010243 | response to organonitrogen compound    | 30           | $7.58 \times 10^{-9}$  |
| GO:1901698 | response to nitrogen compound          | 31           | $9.29 \times 10^{-9}$  |
| GO:0050793 | regulation of developmental process    | 47           | $4.40 \times 10^{-8}$  |
| GO:0030278 | regulation of ossification             | 15           | $5.04 \times 10^{-8}$  |
| GO:0009612 | response to mechanical stimulus        | 15           | $7.59 \times 10^{-8}$  |
| GO:1901700 | response to oxygen-containing compound | 37           | $1.30 \times 10^{-7}$  |

Table S3. Cont.

| GO ID      | GO Term                                                        | No. of Genes | Adjusted <i>p</i> -Value |
|------------|----------------------------------------------------------------|--------------|--------------------------|
| GO:0072359 | circulatory system development                                 | 30           | $1.55 \times 10^{-7}$    |
| GO:0072358 | cardiovascular system development                              | 30           | $1.55 \times 10^{-7}$    |
| GO:2000026 | regulation of multicellular<br>organismal development          | 39           | $1.66 \times 10^{-7}$    |
| GO:0014070 | response to organic cyclic compound                            | 27           | $2.38 \times 10^{-7}$    |
| GO:0001501 | skeletal system development                                    | 21           | $2.82 \times 10^{-7}$    |
| GO:0045595 | regulation of cell differentiation                             | 37           | $5.14 \times 10^{-7}$    |
| GO:0051248 | negative regulation of protein metabolic process               | 24           | $6.07 \times 10^{-7}$    |
| GO:0030097 | hemopoiesis                                                    | 26           | $8.16 \times 10^{-7}$    |
| GO:0061061 | muscle structure development                                   | 22           | $1.13 \times 10^{-6}$    |
| GO:0001933 | negative regulation of protein phosphorylation                 | 16           | $1.13 \times 10^{-6}$    |
| GO:0008283 | cell proliferation                                             | 43           | $1.19 \times 10^{-6}$    |
| GO:0060537 | muscle tissue development                                      | 18           | $1.26 \times 10^{-6}$    |
| GO:0006955 | immune response                                                | 36           | $1.55 \times 10^{-6}$    |
| GO:0042326 | negative regulation of phosphorylation                         | 17           | $1.61 \times 10^{-6}$    |
| GO:0048534 | hematopoietic or lymphoid organ development                    | 26           | $1.61 \times 10^{-6}$    |
| GO:0008285 | negative regulation of cell proliferation                      | 23           | $1.77 \times 10^{-6}$    |
| GO:0009887 | organ morphogenesis                                            | 28           | $1.80 \times 10^{-6}$    |
| GO:0042127 | regulation of cell proliferation                               | 36           | $1.92 \times 10^{-6}$    |
| GO:0045936 | negative regulation of phosphate<br>metabolic process          | 18           | $1.92 \times 10^{-6}$    |
| GO:0010563 | negative regulation of phosphorus<br>metabolic process         | 18           | $1.92 \times 10^{-6}$    |
| GO:0014706 | striated muscle tissue development                             | 17           | $2.78 \times 10^{-6}$    |
| GO:0006469 | negative regulation of protein kinase activity                 | 13           | $3.10 \times 10^{-6}$    |
| GO:0002520 | immune system development                                      | 26           | $3.36 \times 10^{-6}$    |
| GO:0009725 | response to hormone                                            | 26           | $7.36 \times 10^{-6}$    |
| GO:0033673 | negative regulation of kinase activity                         | 13           | $9.14 \times 10^{-6}$    |
| GO:0001944 | vasculature development                                        | 21           | $9.14 \times 10^{-6}$    |
| GO:0006357 | regulation of transcription from RNA<br>polymerase II promoter | 37           | $1.08 \times 10^{-5}$    |
| GO:0007167 | enzyme linked receptor protein<br>signaling pathway            | 28           | $1.32 \times 10^{-5}$    |
| GO:0032269 | negative regulation of cellular protein<br>metabolic process   | 20           | $1.32 \times 10^{-5}$    |
| GO:0010605 | negative regulation of macromolecule<br>metabolic process      | 38           | $1.32 \times 10^{-5}$    |
| GO:0009891 | positive regulation of biosynthetic process                    | 36           | $1.32 \times 10^{-5}$    |
| GO:0006366 | transcription from RNA polymerase II promoter                  | 39           | $1.32 \times 10^{-5}$    |
| GO:0006952 | defense response                                               | 35           | $1.47 \times 10^{-5}$    |
| GO:0001775 | cell activation                                                | 26           | $1.52 \times 10^{-5}$    |

Table S3. Cont.

| GO ID      | GO Term                                                                    | No. of Genes | Adjusted <i>p</i> -Value |
|------------|----------------------------------------------------------------------------|--------------|--------------------------|
| GO:0060429 | epithelium development                                                     | 29           | $1.56 \times 10^{-5}$    |
| GO:0051241 | negative regulation of multicellular<br>organismal process                 | 17           | $1.57 \times 10^{-5}$    |
| GO:0061448 | connective tissue development                                              | 13           | $1.57 \times 10^{-5}$    |
| GO:0031214 | biomineral tissue development                                              | 10           | $1.97 \times 10^{-5}$    |
| GO:0010628 | positive regulation of gene expression                                     | 32           | $2.03 \times 10^{-5}$    |
| GO:0071310 | cellular response to organic substance                                     | 39           | $2.05 \times 10^{-5}$    |
| GO:0007596 | blood coagulation                                                          | 19           | $2.08 \times 10^{-5}$    |
| GO:0030282 | bone mineralization                                                        | 9            | $2.08 \times 10^{-5}$    |
| GO:0050817 | coagulation                                                                | 19           | $2.21 \times 10^{-5}$    |
| GO:0051173 | positive regulation of nitrogen compound<br>metabolic process              | 34           | $2.21 \times 10^{-5}$    |
| GO:0007599 | hemostasis                                                                 | 19           | $2.25 \times 10^{-5}$    |
| GO:0002682 | regulation of immune system process                                        | 30           | $2.37 \times 10^{-5}$    |
| GO:0043086 | negative regulation of catalytic activity                                  | 23           | $2.72 \times 10^{-5}$    |
| GO:0009892 | negative regulation of metabolic process                                   | 39           | $3.06 \times 10^{-5}$    |
| GO:0033993 | response to lipid                                                          | 22           | $3.13 \times 10^{-5}$    |
| GO:0050878 | regulation of body fluid levels                                            | 21           | $3.87 \times 10^{-5}$    |
| GO:0045944 | positive regulation of transcription from RNA<br>polymerase II promoter    | 25           | $4.51 \times 10^{-5}$    |
| GO:0048585 | negative regulation of response to stimulus                                | 28           | $4.56 \times 10^{-5}$    |
| GO:0001568 | blood vessel development                                                   | 19           | $4.72 \times 10^{-5}$    |
| GO:0031328 | positive regulation of cellular<br>biosynthetic process                    | 34           | $4.85 \times 10^{-5}$    |
| GO:0007517 | muscle organ development                                                   | 15           | $6.54 \times 10^{-5}$    |
| GO:0010557 | positive regulation of macromolecule<br>biosynthetic process               | 32           | $7.81 \times 10^{-5}$    |
| GO:0009628 | response to abiotic stimulus                                               | 26           | $8.39 \times 10^{-5}$    |
| GO:1903034 | regulation of response to wounding                                         | 15           | $8.92 \times 10^{-5}$    |
| GO:0045935 | positive regulation of nucleobase-containing<br>compound metabolic process | 32           | $8.92 \times 10^{-5}$    |
| GO:0031400 | negative regulation of protein<br>modification process                     | 16           | $9.28 \times 10^{-5}$    |
| GO:0051591 | response to cAMP                                                           | 8            | $1.35 \times 10^{-4}$    |
| GO:0048514 | blood vessel morphogenesis                                                 | 17           | $1.35 \times 10^{-4}$    |
| GO:0042060 | wound healing                                                              | 20           | $1.59 \times 10^{-4}$    |
| GO:0051348 | negative regulation of transferase activity                                | 13           | $1.59 \times 10^{-4}$    |
| GO:0035295 | tube development                                                           | 19           | $1.59 \times 10^{-4}$    |
| GO:0071495 | cellular response to endogenous stimulus                                   | 25           | $1.61 \times 10^{-4}$    |
| GO:0031324 | negative regulation of cellular metabolic process                          | 35           | $1.63 \times 10^{-4}$    |
| GO:0051254 | positive regulation of RNA metabolic process                               | 29           | $1.71 \times 10^{-4}$    |

Table S3. Cont.

| GO ID      | GO Term                                                            | No. of Genes | Adjusted <i>p</i> -Value |
|------------|--------------------------------------------------------------------|--------------|--------------------------|
| GO:0045893 | positive regulation of transcription,<br>DNA-templated             | 28           | $1.91 \times 10^{-4}$    |
| GO:0043588 | skin development                                                   | 14           | $1.95 \times 10^{-4}$    |
| GO:0002521 | leukocyte differentiation                                          | 16           | $1.95 \times 10^{-4}$    |
| GO:0050673 | epithelial cell proliferation                                      | 13           | $2.42 \times 10^{-4}$    |
| GO:0008544 | epidermis development                                              | 13           | $2.42 \times 10^{-4}$    |
| GO:0051216 | cartilage development                                              | 10           | $2.54 \times 10^{-4}$    |
| GO:0042325 | regulation of phosphorylation                                      | 28           | $2.68 \times 10^{-4}$    |
| GO:0044092 | negative regulation of molecular function                          | 24           | $2.69 \times 10^{-4}$    |
| GO:0014074 | response to purine-containing compound                             | 9            | $2.69 \times 10^{-4}$    |
| GO:0000165 | MAPK cascade                                                       | 19           | $2.69 \times 10^{-4}$    |
| GO:0048732 | gland development                                                  | 15           | $2.69 \times 10^{-4}$    |
| GO:0051093 | negative regulation of developmental process                       | 20           | $2.74 \times 10^{-4}$    |
| GO:0006954 | inflammatory response                                              | 18           | $3.00 \times 10^{-4}$    |
| GO:1902680 | positive regulation of RNA biosynthetic process                    | 28           | $3.05 \times 10^{-4}$    |
| GO:0048545 | response to steroid hormone                                        | 14           | $3.43 \times 10^{-4}$    |
| GO:0030198 | extracellular matrix organization                                  | 14           | $3.81 \times 10^{-4}$    |
| GO:0043062 | extracellular structure organization                               | 14           | $3.88 \times 10^{-4}$    |
| GO:0071901 | negative regulation of protein serine/threonine<br>kinase activity | 8            | $4.27 \times 10^{-4}$    |
| GO:0006873 | cellular ion homeostasis                                           | 16           | $4.42 \times 10^{-4}$    |
| GO:0048646 | anatomical structure formation involved<br>in morphogenesis        | 24           | $4.42 \times 10^{-4}$    |
| GO:0040011 | locomotion                                                         | 31           | $4.82 \times 10^{-4}$    |
| GO:0006936 | muscle contraction                                                 | 12           | $5.18 \times 10^{-4}$    |
| GO:0023014 | signal transduction by protein phosphorylation                     | 19           | $5.44 \times 10^{-4}$    |
| GO:1901652 | response to peptide                                                | 15           | $5.54 \times 10^{-4}$    |
| GO:0006875 | cellular metal ion homeostasis                                     | 15           | $5.77 \times 10^{-4}$    |
| GO:0035051 | cardiocyte differentiation                                         | 8            | $5.93 \times 10^{-4}$    |
| GO:0001649 | osteoblast differentiation                                         | 10           | $5.93 \times 10^{-4}$    |
| GO:1901701 | cellular response to<br>oxygen-containing compound                 | 21           | $5.93 \times 10^{-4}$    |
| GO:0003012 | muscle system process                                              | 13           | $5.93 \times 10^{-4}$    |
| GO:0046683 | response to organophosphorus                                       | 8            | $6.46 \times 10^{-4}$    |
| GO:0045669 | positive regulation of osteoblast differentiation                  | 6            | $6.60 \times 10^{-4}$    |
| GO:0050801 | ion homeostasis                                                    | 18           | $7.07 \times 10^{-4}$    |
| GO:0055065 | metal ion homeostasis                                              | 16           | $7.07 \times 10^{-4}$    |
| GO:0051094 | positive regulation of developmental process                       | 22           | $7.29 \times 10^{-4}$    |
| GO:0010035 | response to inorganic substance                                    | 14           | $7.29 \times 10^{-4}$    |
| GO:0051270 | regulation of cellular component movement                          | 18           | $7.29 \times 10^{-4}$    |
| GO:0051480 | cytosolic calcium ion homeostasis                                  | 11           | $7.35 \times 10^{-4}$    |
| GO:0006939 | smooth muscle contraction                                          | 7            | $7.35 \times 10^{-4}$    |



Table S3. Cont.

| GO ID      | GO Term                                                                  | No. of Genes | Adjusted <i>p</i> -Value |
|------------|--------------------------------------------------------------------------|--------------|--------------------------|
| GO:0016310 | phosphorylation                                                          | 36           | $7.35 \times 10^{-4}$    |
| GO:0007507 | heart development                                                        | 15           | $7.88 \times 10^{-4}$    |
| GO:0070372 | regulation of ERK1 and ERK2 cascade                                      | 9            | $8.48 \times 10^{-4}$    |
| GO:0035914 | skeletal muscle cell differentiation                                     | 6            | $8.55 \times 10^{-4}$    |
| GO:0048584 | positive regulation of response to stimulus                              | 31           | $8.57 \times 10^{-4}$    |
| GO:0010942 | positive regulation of cell death                                        | 15           | $8.80 \times 10^{-4}$    |
| GO:0048705 | skeletal system morphogenesis                                            | 10           | $8.86 \times 10^{-4}$    |
| GO:0051240 | positive regulation of multicellular organismal process                  | 18           | $8.86 \times 10^{-4}$    |
| GO:0009968 | negative regulation of signal transduction                               | 22           | $8.94 \times 10^{-4}$    |
| GO:0080134 | regulation of response to stress                                         | 23           | $9.59 \times 10^{-4}$    |
| GO:0030334 | regulation of cell migration                                             | 16           | $9.59 \times 10^{-4}$    |
| GO:0045597 | positive regulation of cell differentiation                              | 18           | $9.59 \times 10^{-4}$    |
| GO:0050776 | regulation of immune response                                            | 20           | $9.59 \times 10^{-4}$    |
| GO:0090257 | regulation of muscle system process                                      | 9            | $9.59 \times 10^{-4}$    |
| GO:0007519 | skeletal muscle tissue development                                       | 9            | $9.59 \times 10^{-4}$    |
| GO:0030003 | cellular cation homeostasis                                              | 15           | $9.59 \times 10^{-4}$    |
| GO:0060087 | relaxation of vascular smooth muscle                                     | 3            | $9.62 \times 10^{-4}$    |
| GO:0072012 | glomerulus vasculature development                                       | 4            | $1.01 \times 10^{-3}$    |
| GO:0045444 | fat cell differentiation                                                 | 9            | $1.02 \times 10^{-3}$    |
| GO:0007178 | transmembrane receptor protein serine/threonine kinase signaling pathway | 12           | $1.05 \times 10^{-3}$    |
| GO:0043434 | response to peptide hormone                                              | 14           | $1.06 \times 10^{-3}$    |
| GO:0006937 | regulation of muscle contraction                                         | 8            | $1.07 \times 10^{-3}$    |
| GO:0044057 | regulation of system process                                             | 14           | $1.07 \times 10^{-3}$    |
| GO:0060047 | heart contraction                                                        | 9            | $1.07 \times 10^{-3}$    |
| GO:0001932 | regulation of protein phosphorylation                                    | 23           | $1.07 \times 10^{-3}$    |
| GO:0070848 | response to growth factor                                                | 18           | $1.07 \times 10^{-3}$    |
| GO:0003015 | heart process                                                            | 9            | $1.09 \times 10^{-3}$    |
| GO:0045932 | negative regulation of muscle contraction                                | 4            | $1.12 \times 10^{-3}$    |
| GO:0030879 | mammary gland development                                                | 8            | $1.12 \times 10^{-3}$    |
| GO:0006928 | movement of cell or subcellular component                                | 32           | $1.14 \times 10^{-3}$    |
| GO:0043589 | skin morphogenesis                                                       | 5            | $1.14 \times 10^{-3}$    |
| GO:0060538 | skeletal muscle organ development                                        | 9            | $1.14 \times 10^{-3}$    |
| GO:0030168 | platelet activation                                                      | 10           | $1.15 \times 10^{-3}$    |
| GO:0043407 | negative regulation of MAP kinase activity                               | 6            | $1.21 \times 10^{-3}$    |
| GO:0032101 | regulation of response to external stimulus                              | 17           | $1.22 \times 10^{-3}$    |
| GO:0044557 | relaxation of smooth muscle                                              | 3            | $1.25 \times 10^{-3}$    |
| GO:0061440 | kidney vasculature development                                           | 4            | $1.25 \times 10^{-3}$    |
| GO:0090075 | relaxation of muscle                                                     | 4            | $1.25 \times 10^{-3}$    |
| GO:0061437 | renal system vasculature development                                     | 4            | $1.25 \times 10^{-3}$    |
| GO:0045596 | negative regulation of cell differentiation                              | 16           | $1.26 \times 10^{-3}$    |

Table S3. Cont.

| GO ID      | GO Term                                      | No. of Genes | Adjusted <i>p</i> -Value |
|------------|----------------------------------------------|--------------|--------------------------|
| GO:0070371 | ERK1 and ERK2 cascade                        | 9            | $1.27 \times 10^{-3}$    |
| GO:1901607 | alpha-amino acid biosynthetic process        | 6            | $1.33 \times 10^{-3}$    |
| GO:0040012 | regulation of locomotion                     | 17           | $1.43 \times 10^{-3}$    |
| GO:0045667 | regulation of osteoblast differentiation     | 7            | $1.44 \times 10^{-3}$    |
| GO:0043408 | regulation of MAPK cascade                   | 16           | $1.44 \times 10^{-3}$    |
| GO:0022414 | reproductive process                         | 26           | $1.45 \times 10^{-3}$    |
| GO:0023057 | negative regulation of signaling             | 22           | $1.46 \times 10^{-3}$    |
| GO:2000145 | regulation of cell motility                  | 16           | $1.46 \times 10^{-3}$    |
| GO:0055080 | cation homeostasis                           | 16           | $1.46 \times 10^{-3}$    |
| GO:0010648 | negative regulation of cell communication    | 22           | $1.49 \times 10^{-3}$    |
| GO:0006953 | acute-phase response                         | 5            | $1.53 \times 10^{-3}$    |
| GO:0010544 | negative regulation of platelet activation   | 3            | $1.61 \times 10^{-3}$    |
| GO:0042592 | homeostatic process                          | 28           | $1.62 \times 10^{-3}$    |
| GO:0030855 | epithelial cell differentiation              | 16           | $1.73 \times 10^{-3}$    |
| GO:0008016 | regulation of heart contraction              | 8            | $1.75 \times 10^{-3}$    |
| GO:0001525 | angiogenesis                                 | 13           | $1.81 \times 10^{-3}$    |
| GO:0048771 | tissue remodeling                            | 8            | $1.89 \times 10^{-3}$    |
| GO:0071417 | cellular response to organonitrogen compound | 14           | $1.89 \times 10^{-3}$    |
| GO:0016477 | cell migration                               | 23           | $1.89 \times 10^{-3}$    |
| GO:0051707 | response to other organism                   | 18           | $1.91 \times 10^{-3}$    |
| GO:0043207 | response to external biotic stimulus         | 18           | $1.91 \times 10^{-3}$    |
| GO:0071363 | cellular response to growth factor stimulus  | 17           | $2.07 \times 10^{-3}$    |
| GO:0022612 | gland morphogenesis                          | 7            | $2.10 \times 10^{-3}$    |
| GO:0055082 | cellular chemical homeostasis                | 16           | $2.18 \times 10^{-3}$    |
| GO:0006940 | regulation of smooth muscle contraction      | 5            | $2.26 \times 10^{-3}$    |
| GO:0045682 | regulation of epidermis development          | 5            | $2.45 \times 10^{-3}$    |
| GO:0043200 | response to amino acid                       | 6            | $2.60 \times 10^{-3}$    |
| GO:0031069 | hair follicle morphogenesis                  | 4            | $2.60 \times 10^{-3}$    |
| GO:0022617 | extracellular matrix disassembly             | 7            | $2.62 \times 10^{-3}$    |
| GO:0061035 | regulation of cartilage development          | 5            | $2.62 \times 10^{-3}$    |
| GO:0060350 | endochondral bone morphogenesis              | 5            | $2.83 \times 10^{-3}$    |
| GO:0007610 | behavior                                     | 17           | $2.85 \times 10^{-3}$    |
| GO:0050727 | regulation of inflammatory response          | 10           | $2.85 \times 10^{-3}$    |
| GO:0001958 | endochondral ossification                    | 4            | $2.85 \times 10^{-3}$    |
| GO:0036075 | replacement ossification                     | 4            | $2.85 \times 10^{-3}$    |
| GO:0030509 | BMP signaling pathway                        | 7            | $2.91 \times 10^{-3}$    |
| GO:0050678 | regulation of epithelial cell proliferation  | 10           | $2.91 \times 10^{-3}$    |
| GO:0060349 | bone morphogenesis                           | 6            | $2.95 \times 10^{-3}$    |
| GO:0060443 | mammary gland morphogenesis                  | 5            | $2.95 \times 10^{-3}$    |
| GO:0031347 | regulation of defense response               | 15           | $3.01 \times 10^{-3}$    |
| GO:0008015 | blood circulation                            | 13           | $3.01 \times 10^{-3}$    |
| GO:0009607 | response to biotic stimulus                  | 18           | $3.01 \times 10^{-3}$    |
| GO:0002252 | immune effector process                      | 16           | $3.08 \times 10^{-3}$    |
| GO:0003013 | circulatory system process                   | 13           | $3.11 \times 10^{-3}$    |

**Table S4.** Genes more than two-fold up- or down-regulated in PC3 cells co-cultured with *Sost*<sup>KO</sup> osteoblasts compared to PC3 cells co-cultured with WT (wildtype) osteoblasts.

| Genes           | Log2 Fold Change | <i>p</i> -Value       | Adjusted <i>p</i> -Value |
|-----------------|------------------|-----------------------|--------------------------|
| <i>RPL37A</i>   | 3.7984           | $1.63 \times 10^{-5}$ | 0.0345                   |
| <i>UBN2</i>     | 3.6835           | $5.79 \times 10^{-5}$ | 0.0345                   |
| <i>MALAT1</i>   | 3.2281           | 0.000116              | 0.0394                   |
| <i>SLC25A36</i> | 3.0704           | $1.09 \times 10^{-5}$ | 0.0345                   |
| <i>HSP90B1</i>  | 3.0685           | $5.24 \times 10^{-5}$ | 0.0345                   |
| <i>DDX17</i>    | 3.0633           | 0.000165              | 0.0419                   |
| <i>EEF1D</i>    | 2.9534           | $7.11 \times 10^{-5}$ | 0.0345                   |
| <i>C12orf35</i> | 2.9452           | $1.67 \times 10^{-5}$ | 0.0345                   |
| <i>GNAS</i>     | 2.9232           | $1.39 \times 10^{-5}$ | 0.0345                   |
| <i>RPL38</i>    | 2.9194           | $9.45 \times 10^{-6}$ | 0.0345                   |
| <i>ZBED6</i>    | 2.8119           | 0.000214              | 0.0474                   |
| <i>ZNF800</i>   | 2.7524           | $1.96 \times 10^{-5}$ | 0.0345                   |
| <i>MAP4K5</i>   | 2.7270           | $6.85 \times 10^{-5}$ | 0.0345                   |
| <i>ATP13A3</i>  | 2.7142           | 0.0002                | 0.0466                   |
| <i>ATP6V0E1</i> | 2.6892           | $2.76 \times 10^{-5}$ | 0.0345                   |
| <i>MLL3</i>     | 2.6759           | $3.91 \times 10^{-5}$ | 0.0345                   |
| <i>EZR</i>      | 2.6645           | 0.000141              | 0.0396                   |
| <i>CLK4</i>     | 2.6628           | $3.73 \times 10^{-5}$ | 0.0345                   |
| <i>RAB3B</i>    | 2.6213           | $6.89 \times 10^{-5}$ | 0.0345                   |
| <i>SOD2</i>     | 2.5752           | $5.64 \times 10^{-5}$ | 0.0345                   |
| <i>TWF1</i>     | 2.5484           | $1.71 \times 10^{-5}$ | 0.0345                   |
| <i>VMP1</i>     | 2.5188           | 0.00012               | 0.0394                   |
| <i>ST3GAL1</i>  | 2.5174           | 0.000104              | 0.0384                   |
| <i>PDGFA</i>    | 2.5096           | $3.31 \times 10^{-5}$ | 0.0345                   |
| <i>PHLDB2</i>   | 2.4801           | $7.95 \times 10^{-5}$ | 0.0345                   |
| <i>EML4</i>     | 2.4770           | $2.34 \times 10^{-5}$ | 0.0345                   |
| <i>MARCKS</i>   | 2.4571           | $1.97 \times 10^{-5}$ | 0.0345                   |
| <i>MLL</i>      | 2.4461           | 0.000104              | 0.0384                   |
| <i>YIF1B</i>    | 2.4248           | $5.72 \times 10^{-5}$ | 0.0345                   |
| <i>WASL</i>     | 2.3879           | $5.02 \times 10^{-5}$ | 0.0345                   |
| <i>NR1D2</i>    | 2.3861           | $2.78 \times 10^{-5}$ | 0.0345                   |
| <i>TMTC1</i>    | 2.3856           | $5.71 \times 10^{-5}$ | 0.0345                   |
| <i>SEMA3C</i>   | 2.3774           | 0.000112              | 0.0394                   |
| <i>ZMYM2</i>    | 2.3748           | 0.000102              | 0.0384                   |
| <i>CLCN5</i>    | 2.3682           | $4.65 \times 10^{-5}$ | 0.0345                   |
| <i>ZNF652</i>   | 2.3558           | $6.75 \times 10^{-5}$ | 0.0345                   |
| <i>ITPRIPL2</i> | 2.3522           | $5.73 \times 10^{-5}$ | 0.0345                   |
| <i>U2SURP</i>   | 2.3430           | $7.42 \times 10^{-5}$ | 0.0345                   |
| <i>RABGAP1L</i> | 2.3301           | $2.98 \times 10^{-5}$ | 0.0345                   |
| <i>MET</i>      | 2.3207           | 0.000133              | 0.0394                   |
| <i>NCOA2</i>    | 2.3204           | $4.23 \times 10^{-5}$ | 0.0345                   |
| <i>RPS11</i>    | 2.3178           | $2.74 \times 10^{-5}$ | 0.0345                   |
| <i>MORF4L2</i>  | 2.3127           | $6.54 \times 10^{-5}$ | 0.0345                   |

Table S4. Cont.

| Genes            | Log2 Fold Change | p-Value               | Adjusted p-Value |
|------------------|------------------|-----------------------|------------------|
| <i>LIMA1</i>     | 2.2990           | $4.83 \times 10^{-5}$ | 0.0345           |
| <i>HECTD1</i>    | 2.2884           | $9.10 \times 10^{-5}$ | 0.0374           |
| <i>TXNIP</i>     | 2.2771           | 0.000107              | 0.0384           |
| <i>ACBD3</i>     | 2.2585           | $4.26 \times 10^{-5}$ | 0.0345           |
| <i>C6orf106</i>  | 2.2570           | 0.000101              | 0.0384           |
| <i>TOX4</i>      | 2.2316           | $7.68 \times 10^{-5}$ | 0.0345           |
| <i>SKI</i>       | 2.2306           | 0.000159              | 0.0413           |
| <i>TBRG1</i>     | 2.2298           | 0.000124              | 0.0394           |
| <i>CLCN3</i>     | 2.2256           | 0.000101              | 0.0384           |
| <i>ELF1</i>      | 2.2198           | $6.31 \times 10^{-5}$ | 0.0345           |
| <i>FER</i>       | 2.2117           | $3.80 \times 10^{-5}$ | 0.0345           |
| <i>NCOA3</i>     | 2.2112           | 0.000213              | 0.0474           |
| <i>DNAJC3</i>    | 2.1636           | $4.68 \times 10^{-5}$ | 0.0345           |
| <i>OTUD1</i>     | 2.1633           | $4.08 \times 10^{-5}$ | 0.0345           |
| <i>MLLT10</i>    | 2.1401           | $9.99 \times 10^{-5}$ | 0.0384           |
| <i>ATRX</i>      | 2.1244           | 0.000127              | 0.0394           |
| <i>NRIP1</i>     | 2.1065           | $8.98 \times 10^{-5}$ | 0.0374           |
| <i>C15orf29</i>  | 2.1014           | 0.000235              | 0.0496           |
| <i>SOS2</i>      | 2.0970           | 0.000107              | 0.0384           |
| <i>HEATR7A</i>   | 2.0965           | 0.000116              | 0.0394           |
| <i>AHNAK2</i>    | 2.0915           | 0.000185              | 0.0436           |
| <i>FNIP1</i>     | 2.0777           | $6.94 \times 10^{-5}$ | 0.0345           |
| <i>JAK1</i>      | 2.0276           | $6.28 \times 10^{-5}$ | 0.0345           |
| <i>NRP2</i>      | 2.0256           | 0.000129              | 0.0394           |
| <i>BCL10</i>     | 2.0232           | 0.00018               | 0.0429           |
| <i>KAT6A</i>     | 2.0174           | 0.000116              | 0.0394           |
| <i>PTPRA</i>     | 2.0173           | 0.000169              | 0.0419           |
| <i>RPL27A</i>    | 2.0162           | 0.000122              | 0.0394           |
| <i>TTC3</i>      | 1.9963           | 0.00015               | 0.0399           |
| <i>TM4SF1</i>    | 1.9630           | 0.00012               | 0.0394           |
| <i>LPP</i>       | 1.9246           | $8.74 \times 10^{-5}$ | 0.0373           |
| <i>EHBP1L1</i>   | 1.9128           | 0.000132              | 0.0394           |
| <i>E2F3</i>      | 1.9071           | 0.000154              | 0.0405           |
| <i>CAMK2D</i>    | 1.8964           | 0.000119              | 0.0394           |
| <i>BHLHE41</i>   | 1.7969           | 0.000215              | 0.0474           |
| <i>C6orf62</i>   | 1.7833           | 0.000221              | 0.0479           |
| <i>SCYL2</i>     | 1.7793           | 0.000202              | 0.0466           |
| <i>FNBP4</i>     | 1.7791           | 0.000239              | 0.0496           |
| <i>ZMYM5</i>     | 1.7655           | 0.000165              | 0.0419           |
| <i>SQSTM1</i>    | 1.7595           | 0.000208              | 0.0473           |
| <i>RANBP2</i>    | 1.7464           | 0.00018               | 0.0429           |
| <i>RAB2A</i>     | 1.7448           | 0.000177              | 0.0429           |
| <i>TXN</i>       | 1.7151           | 0.00021               | 0.0474           |
| <i>BMP2</i>      | 1.7040           | 0.00024               | 0.0496           |
| <i>MAP1B</i>     | 1.6790           | 0.00022               | 0.0479           |
| <i>LINC00326</i> | -2.7521          | $7.28 \times 10^{-5}$ | 0.0345           |
